# Supplementary material for: Effect of Postharvest Transport and Storage on Color and Firmness Quality of Tomato
Source: MDPI journal article supplement (doi:10.3390/horticulturae7070163), 2021-06-28
Supplement: s1 [file s1]

**Table S1.** The three-way analysis of variance (ANOVA) of chroma, hue, CI, and COL color parameters.

| Color Parameters | Level of Significance ( <i>P</i> -value) |                         |                      |              |              |              |
|------------------|------------------------------------------|-------------------------|----------------------|--------------|--------------|--------------|
|                  | Transport Distance (A)                   | Storage Temperature (B) | Storage Duration (C) | $A \times B$ | $A \times C$ | $B \times C$ |
| <b>Chroma</b>    | =0.4296                                  | =0.9103                 | =0.0727              | =0.5223      | =0.2244      | =0.0923      |
| <b>Hue</b>       | =0.0037                                  | =0.0002                 | =0.0004              | =0.9084      | =0.2308      | <0.0001      |
| <b>CI</b>        | =0.0149                                  | =0.0148                 | <0.0001              | =0.0038      | =0.0071      | <0.0001      |
| <b>COL</b>       | =0.0490                                  | =0.0320                 | =0.0093              | =0.0006      | =0.0006      | <0.0001      |

CI, Color index; COL, tomato color index.
